# Supplementary material for: miRNA-200a/c as potential biomarker in epithelial ovarian cancer (EOC): evidence based on miRNA meta-signature and clinical investigations
Source: PubMed Central journal article supplement (PMC5348417; doi:10.18632/oncotarget.13154), 2016-11-07
Supplement: oncotarget-07-81621-s001.pdf [file oncotarget-07-81621-s001.pdf]

## miRNA-200a/c as potential biomarker in epithelial ovarian cancer (EOC): evidence based on miRNA meta-signature and clinical investigations

### SUPPLEMENTARY FIGURES AND TABLES

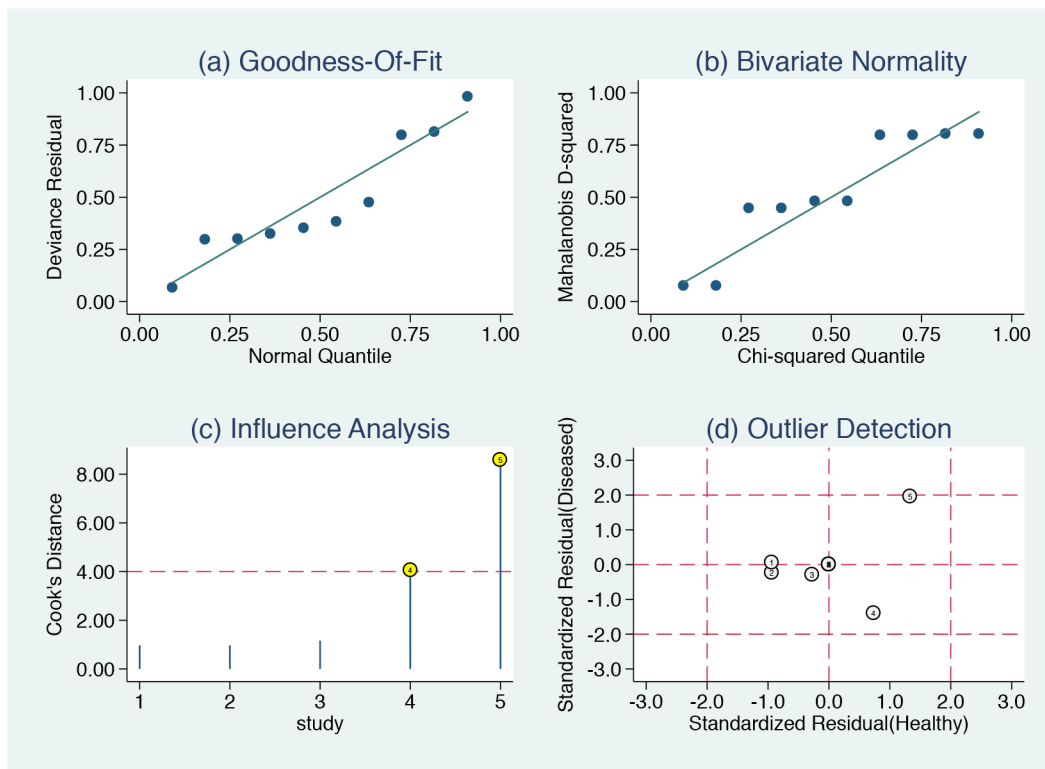

**Supplementary Figure S1: Sensitivity analysis of miR-200a in EOC. A.** goodness-of-fit; **B.** bivariate normality; **C.** influence analysis; **D.** outlier detection.

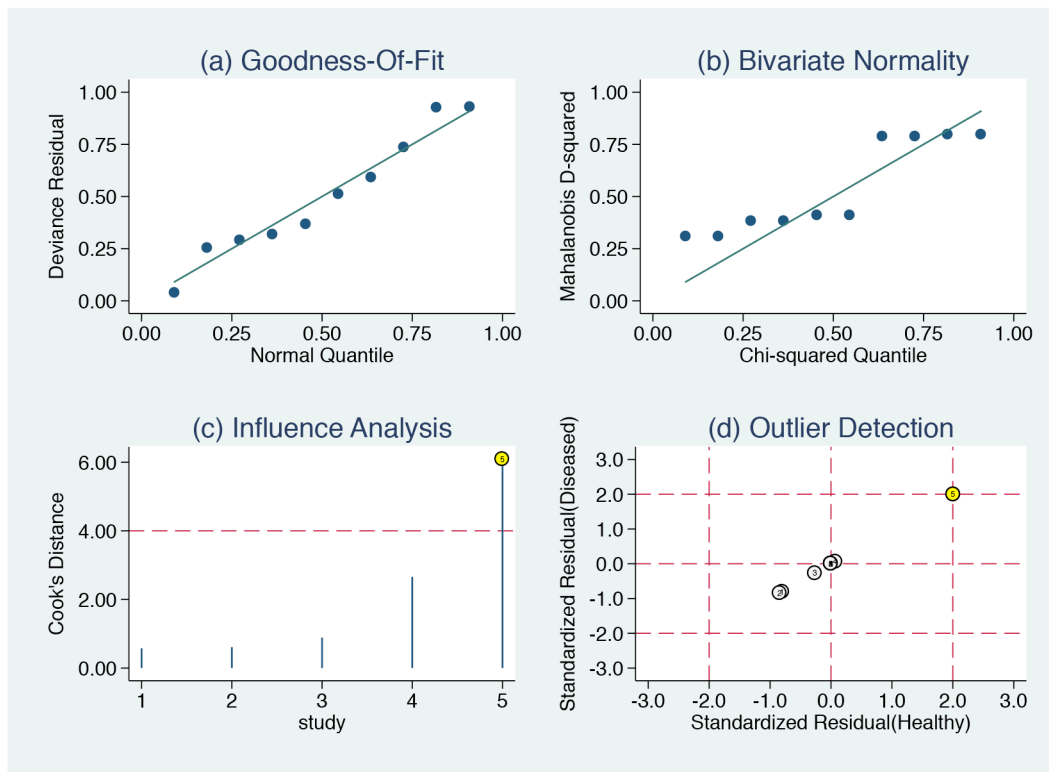

**Supplementary Figure S2: Sensitivity analysis of miR-200c in EOC. A.** goodness-of-fit; **B.** bivariate normality; **C.** influence analysis; **D.** outlier detection.

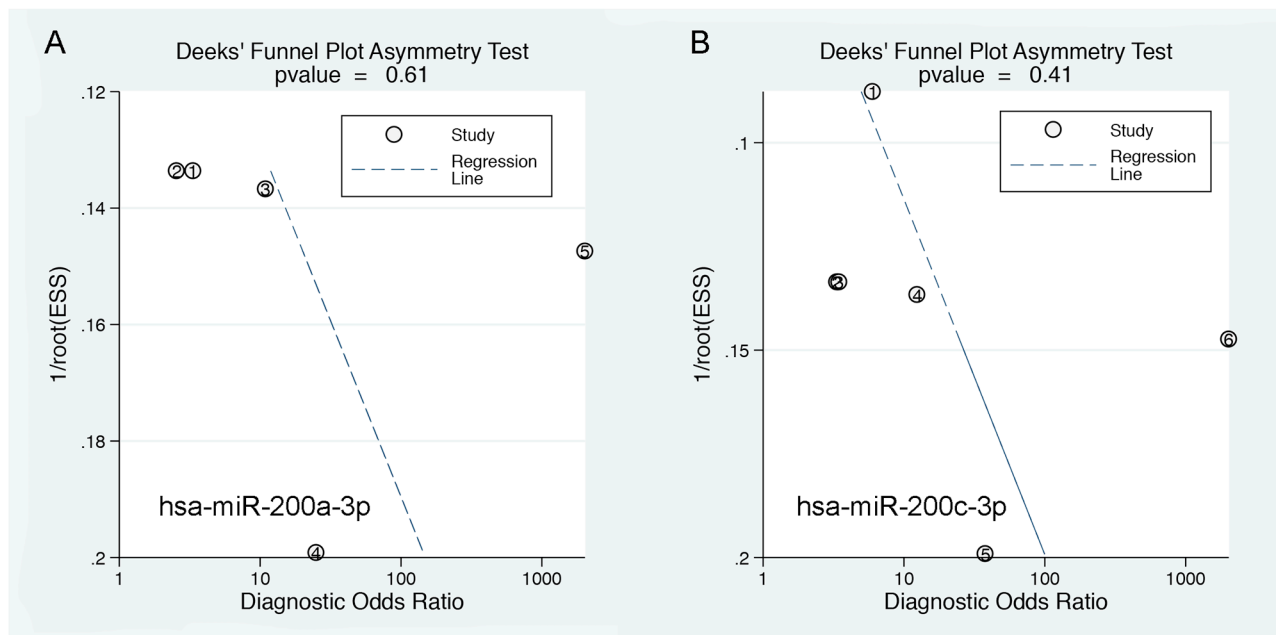

**Supplementary Figure S3: Funnel graph for the assessment of potential publication bias for studies of miR-200a A.** and **miR-200c B.**

**Supplementary Table S1: The combinatorial effect of miR-200a-3p and miR-200c-3p in pathways predicted by DAVID and GeneCoDis algorithms.**

See Supplementary File 1

**Supplementary Table S2: The combinatorial effect of miR-200a-3p and miR-200c-3p in pathways predicted by DIANA miRPath algorithm**

| #  | KEGG pathway                                           | FDR      |
|----|--------------------------------------------------------|----------|
| 1  | Adherens junction                                      | 5.76E-07 |
| 2  | Endometrial cancer                                     | 8.15E-05 |
| 3  | ECM-receptor interaction                               | 5.79E-04 |
| 4  | Bacterial invasion of epithelial cells                 | 5.79E-04 |
| 5  | Prostate cancer                                        | 5.79E-04 |
| 6  | Melanogenesis                                          | 1.22E-03 |
| 7  | Pathways in cancer                                     | 1.22E-03 |
| 8  | Colorectal cancer                                      | 1.22E-03 |
| 9  | Thyroid cancer                                         | 1.22E-03 |
| 10 | Notch signaling pathway                                | 1.97E-03 |
| 11 | Basal cell carcinoma                                   | 4.27E-03 |
| 12 | HTLV-I infection                                       | 4.45E-03 |
| 13 | Wnt signaling pathway                                  | 8.11E-03 |
| 14 | Focal adhesion                                         | 1.40E-02 |
| 15 | Viral carcinogenesis                                   | 2.15E-02 |
| 16 | Arrhythmogenic right ventricular cardiomyopathy (ARVC) | 2.64E-02 |
| 17 | Leukocyte transendothelial migration                   | 3.03E-02 |
| 18 | HIF-1 signaling pathway                                | 3.03E-02 |
